# Supplementary material for: The crystal structure of mammalian inositol 1,3,4,5,6-pentakisphosphate 2-kinase reveals a new zinc-binding site and key features for protein function
Source: PubMed Central journal article supplement (PMC5481561; doi:10.1074/jbc.m117.780395), 2017-04-27
Supplement: 10.1074_M117.780395_jbc.M117.780395-1.pdf [file 10.1074_M117.780395_jbc.M117.780395-1.pdf]

## SUPPLEMENTAL DATA

The Crystal Structure of Mammalian Inositol 1,3,4,5,6-Pentakisphosphate 2-Kinase Reveals a New Zinc Binding Site and Key Features for Protein Function

**Elsa Franco-Echevarría<sup>a</sup>, Julia Sanz-Aparicio<sup>a</sup>, Charles A. Brearley<sup>b</sup>, Juana M<sup>a</sup> González-Rubio<sup>a</sup> and Beatriz González<sup>a#</sup>**

*a Departamento de Cristalografía y Biología Estructural, Instituto de Química-Física “Rocasolano,” CSIC, Serrano 119, 28006-Madrid, Spain*

*b School of Biological Sciences, University of East Anglia, Norwich Research Park, Norwich NR4 7TJ, United Kingdom*

### TABLE OF CONTENTS

|                  |                                                                                                    |
|------------------|----------------------------------------------------------------------------------------------------|
| <b>Figure S1</b> | Electron density map of <i>mIP</i> <sub>5</sub> 2-K ternary and binary complexes.                  |
| <b>Figure S2</b> | Anomalous electron density map of <i>mIP</i> <sub>5</sub> 2-K                                      |
| <b>Table S1</b>  | <i>mIP</i> <sub>5</sub> 2-K residues involved in ligands binding through polar contacts < 4 Å.     |
| <b>Table S2</b>  | Metal content of LSL- <i>mIP</i> <sub>5</sub> 2-K measured by ICPOES                               |
| <b>Table S3</b>  | DNA primers used for the $\Delta C$ - <i>mIP</i> <sub>5</sub> 2-K constructs prepared in this work |

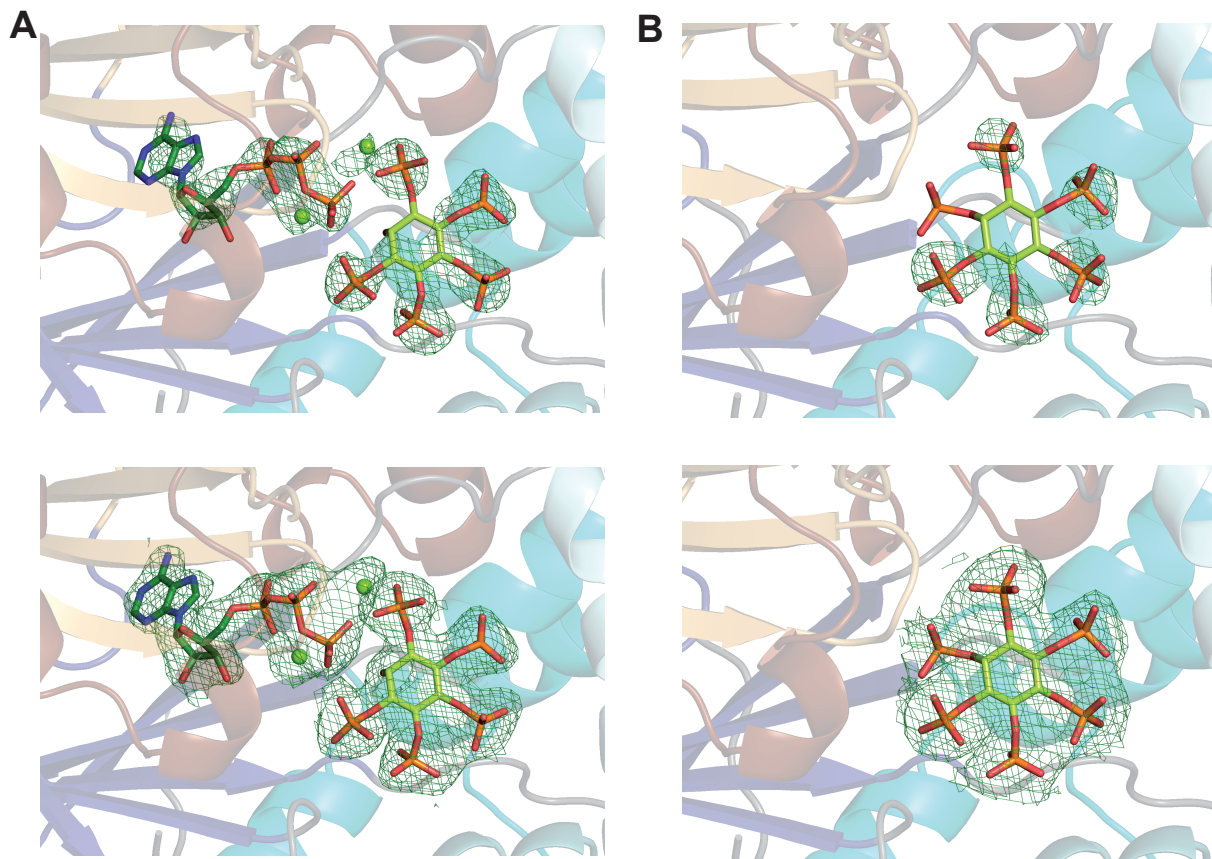

**Figure S1. Electron density map of *mIP*<sub>5</sub> 2-K ternary and binary complexes.**

*A*, electron density map for the ternary complex. Protein and ligands (ATP and IP<sub>5</sub>) are shown as cartoon and sticks representation respectively. Mg ions are shown as green spheres. The upper panel shows the composite omit map Fo-Fc using the annealing protocol and the torsion method, and contoured at 3 $\sigma$  level. The lower panel corresponds to the  $\sigma$ -weighted 2Fo-Fc electron density map contoured at 1.0  $\sigma$ . *B*, Same as *A* for the binary complex, showing IP<sub>6</sub>.

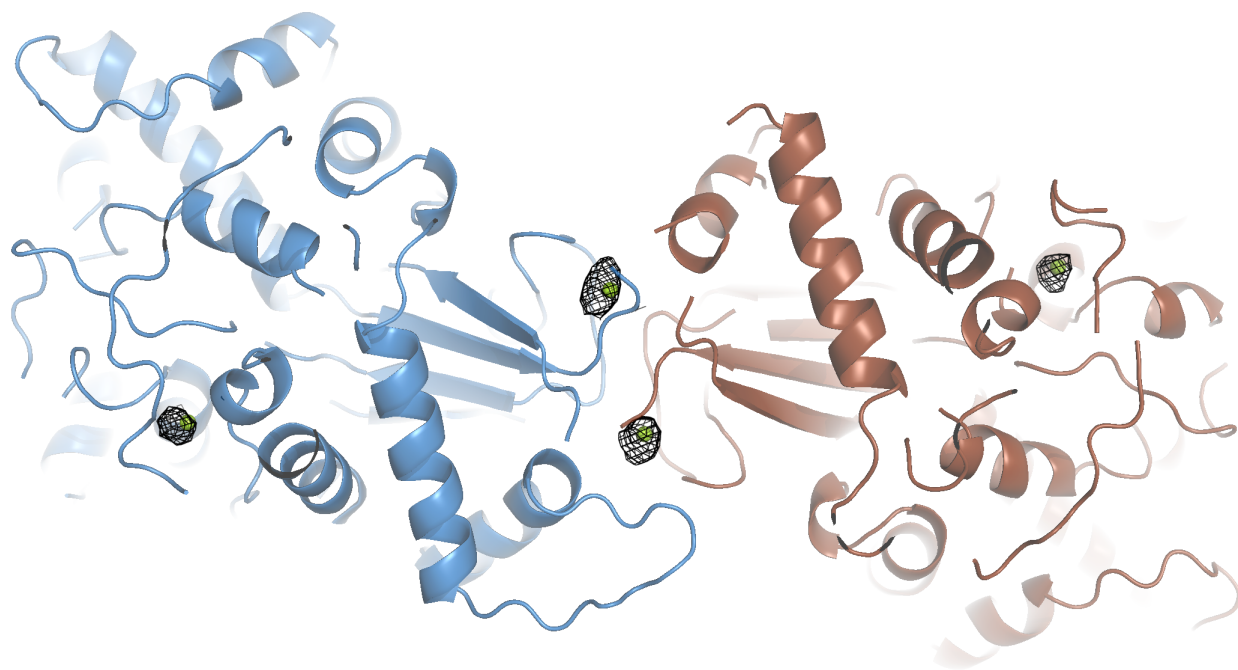

**Figure S2. Anomalous electron density map of *mIP<sub>5</sub> 2-K***

Anomalous electron density map for the *mIP<sub>5</sub> 2-K* crystals obtained at 3.2 Å. The two molecules of the asymmetric unit are represented in different colours. The four Zinc atoms are shown as green spheres. The electron density shown corresponds to the anomalous 2Fo-Fc map contoured at 4 $\sigma$  level.

**Table S1. *mIP*<sub>5</sub> 2-K residues involved in ligands binding through polar contacts < 4 Å.**

| <b>IP<sub>5</sub></b> | <b>d ( Å)</b>           | <b>IP<sub>5</sub> ligand</b> | <b>ATP</b> | <b>d ( Å)</b>               | <b>ATP ligand</b>          |
|-----------------------|-------------------------|------------------------------|------------|-----------------------------|----------------------------|
| P1                    | 4.0                     | N18 (N)                      | N1         | 3.0                         | L118 (N)                   |
| P1                    | 2.7                     | R100 (NH1)                   | N3         | 3.4                         | H14 (ND1)                  |
| P1                    | 3.3                     | R100 (NH2)                   | N6         | 2.8                         | P116 (O)                   |
| P1                    | 3.3                     | <b>K138 (NZ)</b>             | O2'        | 2.5                         | E136 (OE2)                 |
| P1                    | 3.4                     | K173 (NZ)                    | O3'        | 2.7                         | E136 (OE1)                 |
| P1                    | 2.8                     | N206 (ND2)                   | O3'        | 3.8                         | R209 (NH1)                 |
| OH2                   | 2.8                     | <b>K138(NZ)</b>              | Pα, Pβ     | 2.8,3.2                     | S20 (OG)                   |
| OH2                   | 2.7                     | <b>D400 (OD1)</b>            | Pα, Pβ     | 2.9                         | R33 (NH2)                  |
| OH2                   | 2.7                     | <b>D400 (OD2)</b>            | Pβ         | 3.4                         | G17 (N)                    |
| P3                    | 3.4                     | N18 (ND2)                    | Pβ         | 3.1                         | K19 (N)                    |
| P3                    | 4.0                     | K19N                         | Pβ         | 2.9                         | S20 (N)                    |
| P3                    | 3.6                     | K19 (NZ)                     | Pγ         | 3.3                         | N18 (N)                    |
| P3                    | 3.1                     | K441 (NZ)                    | Pγ         | 3.5                         | K138 (NZ)                  |
| P3                    | 2.8                     | Mg1                          | Pγ         | 3.3-W <sub>3</sub> -3.0     | N206 (ND2)                 |
| P4                    | 2.6                     | Q449 (NE2)                   | Pγ         | 3.2                         | <b>D400 (OD2)</b>          |
| P5                    | 3.4                     | K140(NZ)                     | Pβ, Pγ     | 2.6,2.6                     | Mg1                        |
| P5                    | 2.6-W <sub>1</sub> -3.2 | R160 (NE)                    | Pα, Pβ, Pγ | 2.0, 2.8, 2.2               | Mg2                        |
| P5                    | 3.6                     | R160 (NH2)                   |            |                             |                            |
| P5                    | 3.1-W <sub>1</sub> -2.7 | H164 (ND1)                   | <b>Mg</b>  | <b>d ( Å)</b>               | <b>Mg ligand</b>           |
| P6                    | 2.9                     | <b>K138 (NZ)</b>             | Mg1        | 2.4                         | <b>D437 (OD1)</b>          |
| P6                    | 3.3                     | K140 (NZ)                    | Mg1        | 3.7,3.7                     | <b>D439 (OD1, OD2)</b>     |
| P6                    | 2.8,3.4                 | K168 (NZ)                    | Mg1        | 2.6,2.6                     | Pβ, Pγ ATP                 |
| P6                    | 3.1,3.3                 | N206 (ND2)                   | Mg1        | 2.8                         | P3 IP5                     |
| P6                    | 3.0-W <sub>2</sub> -2.8 | N206 (OD1)                   | Mg2        | 2.3                         | <b>D437 (OD2)</b>          |
| P6                    | 2.9-W <sub>2</sub> -2.8 | N207 (OD1)                   | Mg2        | 2.4-W <sub>4</sub> -3.0,2.6 | <b>D400 (O), S402 (OG)</b> |
|                       |                         |                              | Mg2        | 2.0,2.8,2.2                 | Pα, Pβ, Pγ ATP             |

Notes:

W: water

Bold letter: catalytic residues

P: phosphate group

**Table S2. Metal content of LSL-mIP<sub>5</sub> 2-K samples measured by ICPOES**

| <i>mIP<sub>5</sub> 2-K samples</i> | [Zn]/SD*            | [Co]/SD             | [Ni]/SD             | [Cu]/SD             | [Cu]/SD             | [Ni]/SD             | [Fe]/SD             | [Mn]/SD             |
|------------------------------------|---------------------|---------------------|---------------------|---------------------|---------------------|---------------------|---------------------|---------------------|
|                                    | 213.857<br>nm<br>μM | 228.615<br>nm<br>μM | 230.299<br>nm<br>μM | 327.395<br>nm<br>μM | 324.754<br>nm<br>μM | 231.604<br>nm<br>μM | 259.940<br>nm<br>μM | 259.372<br>nm<br>μM |
| WT                                 | 17,761/<br>0,226    | 0,445/<br>0,062     | 0,520/<br>0,168     | 0,468/<br>0,024     | 0,301/<br>0,011     | 0,679/<br>0,099     | 0,899/<br>0,179     | 0,028/<br>0,002     |
| H129S                              | 13,978/<br>0,306    | 0,172/<br>0,050     | 1,646/<br>0,338     | 0,564/<br>0,098     | 0,336/<br>0,015     | -0,050/<br>-0,033   | 0,245/<br>0,080     | -0,026/<br>0,004    |
| C291S                              | 4,086/<br>0,113     | 0,772/<br>0,150     | 0,622/<br>0,355     | 0,308/<br>0,044     | 0,034/<br>0,001     | -0,019/<br>-0,006   | 0,666/<br>0,240     | 3,897/<br>0,128     |
| C410S                              | 11,478/<br>0,266    | 0,623/<br>0,092     | 1,173/<br>0,358     | 0,393/<br>0,031     | 0,608/<br>0,015     | -0,746/<br>-0,515   | 0,497/<br>0,169     | 0,128/<br>0,008     |

\* Mean of metal concentration (experiment performed in triplicate)/standard deviation

| <i>LSL-mIP<sub>5</sub> 2-K sample</i> | Zinc                |                     | Protein: Zinc<br>molar ratio |
|---------------------------------------|---------------------|---------------------|------------------------------|
|                                       | Concentration<br>μM | Concentration<br>μM |                              |
| WT                                    | 30,5                | 17,8                | 1:0.6                        |
| H129S                                 | 16,7                | 14,0                | 1:0.8                        |
| C291S                                 | 11,1                | 4,1                 | 1:0.4                        |
| C410S                                 | 16,7                | 11,5                | 1:0.7                        |

NOTE: values with buffer discount of 0.28 microM

**Table S3. DNA primers used for the  $\Delta C$ -mIP<sub>5</sub> 2-K constructs prepared in this work.**

| Construct                            | N. | F/R <sup>1</sup> | Primer sequence 5'-3'                                          | Cloning sites                       | PCR template                   |
|--------------------------------------|----|------------------|----------------------------------------------------------------|-------------------------------------|--------------------------------|
| $\Delta$ CmIP52K/pKLSLt              | 1  | F                | CATGCCAAAGATT <b>AG</b> ACTGTGAGGTCG                           | EcorI/HindIII.<br>Stop codón at 470 | mIP52K/PKLSL                   |
|                                      | 2  | R                | CGACCTCACAGTCTAATCTTTGGCATG                                    |                                     |                                |
| N18G/K19A- $\Delta$ CmIP52K/pKLSLt   | 3  | F                | CATGGCGAAGGCG <b>GGCGCG</b> AGCCTTGTGGTG                       | EcorI/HindIII                       | $\Delta$ CmIP52K/pKLSLt        |
|                                      | 4  | R                | CACCACAAGGCT <b>CGCGCC</b> GCCTTCGCCATG                        |                                     |                                |
| R100A- $\Delta$ CmIP52K/pKLSLt       | 5  | F                | GACCAGAGTCC <b>GGCTT</b> GTGACAAGGAC                           | EcorI/HindIII                       | $\Delta$ CmIP52K/pKLSLt        |
|                                      | 6  | R                | GTCCTTGTCA <b>CAAGC</b> GGACTCTGGTC                            |                                     |                                |
| H129S- $\Delta$ CmIP52K/pKLSLt       | 7  | F                | CACTTTGCAGAG <b>AGC</b> CGGCCGATTCTG                           | EcorI/HindIII                       | $\Delta$ CmIP52K/pKLSLt        |
|                                      | 8  | R                | CAGAATCGGCC <b>GGCT</b> CTCTGCAAAGTG                           |                                     |                                |
| K138A- $\Delta$ CmIP52K/pKLSLt       | 9  | F                | CCCACATTT <b>GGCGCA</b> ATCTCTACACAC                           | EcorI/HindIII                       | $\Delta$ CmIP52K/pKLSLt        |
|                                      | 10 | R                | GTGTGTAGAGATT <b>GGCC</b> AAAATGTGGG                           |                                     |                                |
| K173A- $\Delta$ CmIP52K/pKLSLt       | 11 | F                | GGTAGCAACTGG <b>AGCGT</b> GGAAGAAAATC                          | EcorI/HindIII                       | $\Delta$ CmIP52K/pKLSLt        |
|                                      | 12 | R                | GATTTTCTT <b>CCACGC</b> TCCAGTTGCTACC                          |                                     |                                |
| C181S- $\Delta$ CmIP52K/pKLSLt       | 13 | F                | TAAATAC <b>AG</b> CCCCCTCGACCTCTACTCAGGA<br>AATAA              | EcorI/HindIII                       | $\Delta$ CmIP52K/pKLSLt        |
|                                      | 14 | R                | TTATTTCTGAGTAGAGGTCGAGGGGG <b>CTGT</b><br>ATTTA                |                                     |                                |
| L281A- $\Delta$ CmIP52K/pKLSLt       | 15 | F                | CCCGAGCTGGTGCC <b>GCA</b> AGGCTTGGGCTCC<br>AGGGCCCA            | EcorI/HindIII                       | $\Delta$ CmIP52K/pKLSLt        |
|                                      | 16 | R                | TGGGCCCTGGAGCCCAAGCCTT <b>GCGGC</b> CACC<br>AGCTCGGG           |                                     |                                |
| L281A/L283A- $\Delta$ CmIP52K/pKLSLt | 17 | F                | CCCGAGCTGGTGCC <b>GCA</b> AGG <b>CT</b> GGGCTCC<br>AGGGCCCA    | EcorI/HindIII                       | L281A- $\Delta$ CmIP52K/pKLSLt |
|                                      | 18 | R                | TGGGCCCTGGAGCCCA <b>AGC</b> CCTT <b>GCGGC</b> CACC<br>AGCTCGGG |                                     |                                |
| C291S- $\Delta$ CmIP52K/pKLSLt S     | 19 | F                | GGGCCACGAGTC <b>AGC</b> GGAAGCCAGTCC                           | EcorI/HindIII                       | $\Delta$ CmIP52K/pKLSLt        |
|                                      | 20 | R                | GGACTGGCTT <b>CGT</b> GACTCGTGGGCC                             |                                     |                                |
| Y363A- $\Delta$ CmIP52K/pKLSLt       | 21 | F                | GATGGGCCT <b>GCT</b> GATGAAGTATTTTACC                          | EcorI/HindIII                       | $\Delta$ CmIP52K/pKLSLt        |
|                                      | 22 | R                | GGTAAAATACTTCATC <b>AGC</b> AGGCCCATC                          |                                     |                                |
| C410S- $\Delta$ CmIP52K/pKLSLt       | 23 | F                | GCACTTTCCCT <b>AGC</b> CTACAGGGCACC                            | EcorI/HindIII                       | $\Delta$ CmIP52K/pKLSLt        |
|                                      | 24 | R                | GGTGCCCTGTAG <b>GCT</b> AGGGGAAAGTGC                           |                                     |                                |
| D437A- $\Delta$ CmIP52K/pKLSLt       | 25 | F                | GTCTGTATT <b>GGCC</b> CTCGACCTCAAGC                            | EcorI/HindIII                       | $\Delta$ CmIP52K/pKLSLt        |
|                                      | 26 | R                | GCTTGAGGTGAG <b>GGCC</b> AATACAGAC                             |                                     |                                |
| D439A- $\Delta$ CmIP52K/pKLSLt       | 27 | F                | GTATTGGACCT <b>CGCC</b> CTCAAGCCCTATG                          | EcorI/HindIII                       | $\Delta$ CmIP52K/pKLSLt        |
|                                      | 28 | R                | CATAGGGCTTGAG <b>GGCG</b> GAGGTCCAATAC                         |                                     |                                |

\* bold letter marks the position of the mutated codon.

<sup>1</sup>F/R=Forward/Reverse
